# Supplementary material for: The importance of “time to surgery” in the management of lumbar disc herniation in patients without progressive neurological deficits
Source: PubMed Central journal article supplement — J Spine Surg. 2023 Feb 7;9(1):32–8. doi: 10.21037/jss-22-68 (PMC10082427; doi:10.21037/jss-22-68), 2023-02-07
Supplement: jss-09-01-32-dss.pdf [file jss-09-01-32-dss.pdf]

## Data Sharing Statement

|                     |                                                                                                                                                     |                                                                                                                                                                                                                       |
|---------------------|-----------------------------------------------------------------------------------------------------------------------------------------------------|-----------------------------------------------------------------------------------------------------------------------------------------------------------------------------------------------------------------------|
| <b>Article Info</b> | https://dx.doi.org/10.21037/jss-22-68                                                                                                               |                                                                                                                                                                                                                       |
| <b>Item</b>         | <b>Question</b>                                                                                                                                     | <b>Authors' Response<br/>(place "-" if not applicable)</b>                                                                                                                                                            |
| 1                   | Would you like to share data collected for your study to others?                                                                                    | Yes                                                                                                                                                                                                                   |
| 2                   | If not, would you like to share the reason for your decision?                                                                                       | -                                                                                                                                                                                                                     |
| 3                   | What data in particular will be shared?                                                                                                             | Data relating to our patient demographics, operative details and statistical data.                                                                                                                                    |
| 4                   | Any other documents will be shared? Such as study protocol, statistical analysis plan, informed consent form, clinical study report, analytic code. | -                                                                                                                                                                                                                     |
| 5                   | When will data availability begin?                                                                                                                  | From the publication date                                                                                                                                                                                             |
| 6                   | When will data availability end?                                                                                                                    | -                                                                                                                                                                                                                     |
| 7                   | To whom will you share the data?                                                                                                                    | Upon reasonable request from researchers and clinicians interested in the importance of "Time to Surgery" in the management of lumbar disc herniation in patients without progressive neurological deficits.          |
| 8                   | For what type of analysis or purpose?                                                                                                               | For the purpose of systematic review/meta-analysis and for analysis to evaluate the importance of "Time to Surgery" in the management of lumbar disc herniation in patients without progressive neurological deficits |
| 9                   | How or where can the data/documents be obtained?                                                                                                    | Upon reasonable request submitted to the corresponding author, Ishani Gurung, <a href="mailto:ishy.gurung@nhs.net">ishy.gurung@nhs.net</a>                                                                            |
| 10                  | Any other restrictions?                                                                                                                             | The corresponding author will weigh up the potential benefits and risks for each request and then provide the data that could be shared                                                                               |
